# Supplementary material
Source: PubMed Central journal article supplement (PMC5275739)
Supplement: PRO-26-327-s006.pdf [file PRO-26-327-s006.pdf]

**Table S2: Data collection and refinement statistics.**

|                                   | <b>cfYvh1-PD</b>                    | <b>cfTif6</b>                                   |
|-----------------------------------|-------------------------------------|-------------------------------------------------|
| <b>Data collection</b>            |                                     |                                                 |
| Beamline                          | ESRF ID23-2                         | ESRF ID23-2                                     |
| Wavelength (Å)                    | 0.87260                             | 0.87260                                         |
| Space group                       | <i>P4<sub>3</sub>2<sub>1</sub>2</i> | <i>P2<sub>1</sub>2<sub>1</sub>2<sub>1</sub></i> |
| Cell dimensions                   |                                     |                                                 |
| a, b, c (Å)                       | 88.76, 88.76, 53.08                 | 54.35, 63.37, 78.66                             |
| $\alpha$ , $\beta$ , $\gamma$ (°) | 90, 90, 90                          | 90, 90, 90                                      |
| Resolution (Å)                    | 45.56–1.64 (1.70–1.64)*             | 49.36–1.50 (1.55–1.50)*                         |
| $R_{\text{merge}}$                | 0.056 (0.581)                       | 0.062 (0.619)                                   |
| $I/\sigma(I)$                     | 20.59 (3.25)                        | 16.84 (2.67)                                    |
| Reflections total                 | 221794 (21365)                      | 212484 (13715)                                  |
| Reflections unique                | 25800 (2455)                        | 43870 (4141)                                    |
| Completeness (%)                  | 98.0 (96.0)                         | 99.0 (95.0)                                     |
| Multiplicity                      | 8.6 (8.7)                           | 4.8 (3.3)                                       |
| <b>Refinement</b>                 |                                     |                                                 |
| $R_{\text{work}}$                 | 0.1629 (0.2042)                     | 0.1501 (0.2220)                                 |
| $R_{\text{free}}$                 | 0.1869 (0.2431)                     | 0.1768 (0.2556)                                 |
| No. atoms                         |                                     |                                                 |
| Protein                           | 1370                                | 1812                                            |
| Water                             | 222                                 | 248                                             |
| Ligands                           | 20                                  | 27                                              |
| B-factors                         |                                     |                                                 |
| Protein                           | 31.01                               | 17.01                                           |
| Water                             | 47.30                               | 34.81                                           |
| Ligands                           | 47.27                               | 40.36                                           |
| R.m.s deviations                  |                                     |                                                 |
| Bond lengths (Å)                  | 0.017                               | 0.017                                           |
| Bond angles (°)                   | 1.39                                | 1.57                                            |
| Ramachandran plot                 |                                     |                                                 |
| Most favoured (%)                 | 95.0                                | 96.0                                            |
| Disallowed                        | 0.6                                 | 0.0                                             |

\* Values in parenthesis refer to the highest resolution shell.
